1 **Picoeukaryotic photosynthetic potential is functionally redundant**  
2 **but taxonomically structured at global scale**

3

4

5 Alexandre Schickele<sup>1\*</sup>, Pavla Debeljak<sup>2,3</sup>, Sakina-Dorothee Ayata<sup>4</sup>, Lucie Bittner<sup>2,5</sup>, Eric  
6 Pelletier<sup>6,7</sup>, Lionel Guidi<sup>1,7\*\*</sup> and Jean-Olivier Irisson<sup>1,7\*\*</sup>

7 <sup>1</sup>Sorbonne Université, CNRS, Laboratoire d'Océanographie de Villefranche, LOV, F-06230  
8 Villefranche-sur-Mer, France.

9 <sup>2</sup>Sorbonne Université, Muséum National d'Histoire Naturelle, CNRS, EPHE, Université des  
10 Antilles, Institut de Systématique, Evolution, Biodiversité (ISYEB), F-75005, Paris, France.

11 <sup>3</sup>SupBiotech, Villejuif, France

12 <sup>4</sup>Sorbonne Université, CNRS, IRD, MNHN, Laboratoire d'Océanographie et du Climat, Institut  
13 Pierre Simon Laplace, LOCEAN-IPSL, F-75005 Paris, France

14 <sup>5</sup>Institut Universitaire de France, Paris, France.

15 <sup>6</sup>Metabolic Genomics, Genoscope, Institut de Biologie François Jacob, CEA, CNRS, Univ Evry,  
16 Université Paris Saclay, 91000 Evry, France.

17 <sup>7</sup>Research Federation for the study of Global Ocean Systems Ecology and Evolution,  
18 FR2022/Tara Oceans GOSEE, Paris, France

19

20 \*Corresponding author

21 \*\*These authors contributed equally

22

23 **Correspondence** and requests for materials should be addressed to A.S. at  
24 [alexandre.schickele@imev-mer.fr](mailto:alexandre.schickele@imev-mer.fr)

25

26 **Abstract**

27 Primary production, performed by RUBISCO, and often associated with carbon concentration  
28 mechanisms, is of major importance in the oceans. Thanks to growing metagenomic resources  
29 (e.g., eukaryotic Metagenome-Assembled-Genomes; MAGs), we provide the first reproducible  
30 machine-learning-based framework to derive the potential biogeography of a given function,  
31 through the multi-output regression of the standardized number of reads of the associated genes  
32 on environmental climatologies. We use it to study the genomic potential of C4-photosynthesis of  
33 picoeukaryotes, a diverse and abundant group of marine unicellular photosynthetic organisms. We  
34 show that the genomic potential supporting C4-enzymes and RUBISCO exhibit strong functional  
35 redundancy and an important affinity towards tropical oligotrophic waters. This redundancy is then  
36 structured taxonomically by the dominance of Mamiellophyceae and Prymnesiophyceae in mid and  
37 high latitudes. Finally, unlike the genomic potential related to most C4-enzymes, the one of  
38 RUBISCO showed a clear pattern affinity for temperate waters.

39

40 **Keywords:** carbon concentration mechanisms; metagenomic; biogeography; multivariate  
41 boosted tree regressor; picoeukaryotes

42

43

44

## 45 INTRODUCTION

46

47 Most of the photosynthetic production on earth relies on the ribulose-1,5-bisphosphate carboxylase  
48 oxygenase (RUBISCO; 1). However, because RUBISCO emerged ~2 billion years ago in a period  
49 characterized by low oxygen (2), its carboxylase function is surprisingly inefficient relative to its  
50 oxygenase function, when considering the contemporary CO<sub>2</sub>-to-oxygen ratio (3). To compensate  
51 for this metabolic caveat related to RUBISCO-only photosynthesis (i.e., C<sub>3</sub>-photosynthesis), carbon  
52 fixation pathways evolved ~30 million years ago, when atmospheric CO<sub>2</sub> levels were estimated  
53 under 200 ppm. The latter induced selective pressure towards higher carbon fixation efficiency,  
54 leading to the development of various Carbon Concentration Mechanisms (CCMs; i.e., biophysical  
55 or biochemical) to compensate for the photorespiration affinity of RUBISCO (4). Among  
56 biochemical CCMs, C<sub>4</sub>-enzymes independently evolved across a large variety of marine and  
57 terrestrial lineages (4, 5). The C<sub>4</sub> cycle is performed through 3 acid-decarboxylation types, leading  
58 to an increase of the CO<sub>2</sub>-to-oxygen ratio at the active site of RUBISCO (6): the MDC-NADP type,  
59 the MDC-NAD type, and the PEPCK type. The common enzyme to all C<sub>4</sub> acid decarboxylation  
60 types is phosphoenolpyruvate carboxylase (PEPC), fixing CO<sub>2</sub> in the cytosol by producing  
61 oxaloacetate. In the MDC-NADP type, oxaloacetate is transferred to the chloroplast and reduced  
62 to malate. The latter is then decarboxylated, producing CO<sub>2</sub> and pyruvate, which is converted back  
63 to phosphoenolpyruvate. In the MDC-NAD type, oxaloacetate is transferred to the mitochondria  
64 and reduced to malate. The decarboxylation reaction transfers CO<sub>2</sub> to the chloroplast by producing  
65 pyruvate that is transferred back to the chloroplast to be converted to phosphoenolpyruvate. Finally,  
66 the PEPCK type directly converts the mitochondrial oxaloacetate to phosphoenolpyruvate.  
67 However, it partially performs the MDH-NAD reduction and MDC-NADP decarboxylation reactions  
68 to balance the ATP and NADPH budget, leading to common reactions and enzymes between acid-  
69 decarboxylation types (6). In the terrestrial realm, both physiological measurements and stable  
70 isotope techniques confirmed the presence of C<sub>3</sub>-photosynthesis across a large range of  
71 environmental conditions, conversely to C<sub>4</sub>-photosynthesis that is adapted to warm, nutrient poor  
72 and high irradiance conditions (7, 8). In the marine realm however, only a few studies explored the  
73 environmental affinity of C<sub>4</sub>-photosynthesis regarding terrestrial-based hypotheses (e.g., 5, 9, 10).  
74 The potential for C<sub>4</sub>-photosynthesis is highly suspected in key picoeukaryote lineages such as  
75 Mamiellophyceae and Prymnesiophyceae. Currently, subcellular evidence for C<sub>4</sub>-enzymes include  
76 (i) MDC-NADP and PEPC in *Ostreococcus Tauri* (11), (ii) MDC-NADP, PEPC, three different  
77 oxoglutarate-to-malate translocator and pyruvate phosphate dikinase (PEPDK) in various  
78 *Micromonas* strains (12) and (iii) PEPC in *Prymnesiophyceae* (*Emiliana Huxleyi*; plastid presence  
79 and gene encoding; , 13).

80

81 Marine carbon fixation is largely performed by picoeukaryotes (e.g., 30 to 50 % of global primary  
82 production, 14, 15), some of which are suspected to use C<sub>4</sub>-photosynthesis (e.g., in picoeukaryotic  
83 diatoms; , 5, 9). Picoeukaryotes correspond to the unicellular eukaryotic marine plankton, that are  
84 among the most diverse and abundant organisms in the sunlit layer of the world ocean (16–18). In  
85 nutrient-poor areas, such as the oligotrophic open ocean, they locally contribute up to 80 % of the  
86 phytoplanktonic biomass (19). However, because of their size (i.e., 0.8 to 5 μm), poor  
87 representation in culture collections (20) and thus the difficulty for both physiological measurements  
88 and stable isotope analysis in natural populations, the genomic potential supporting C<sub>3</sub>, and C<sub>4</sub>-  
89 photosynthesis, its associated biogeography and functioning remains scarcely documented (5, 8,  
90 9).

91

92 Recent global expeditions focusing on surface plankton sampling, together with advances in  
93 metagenomic sequencing, provided unique data to address the genomic potential and  
94 biogeography-related gaps (e.g., 21–24). In this context, metagenomics data are of growing interest  
95 to explore the hidden taxonomic and functional diversity potentially related to carbon fixation in  
96 picoeukaryotes (e.g., 25, 26). For example, genome-resolved metagenomics (27) based on the  
97 *Tara-Oceans* eukaryotic metagenome led to the reconstruction of ~800 Metagenome-Assembled-

98 Genomes (MAGs; 28). The latter are defined as genome-based taxonomic units, functionally and  
99 taxonomically annotated, and quantified by their associated genome-wide metagenomic reads.  
100 Therefore, MAGs offer the unique opportunity to study the genomic potential supporting carbon  
101 fixation and its biogeography, through both a functional and a taxonomic prism.  
102

103 Habitat modelling is a popular niche theory-based tool to estimate species biogeography according  
104 to the environmental conditions in which they are observed (29). Marine organisms are known for  
105 their important sensitivity to their surrounding environmental conditions, influencing growth,  
106 reproduction, and metabolic efficiency across all life stages (30). Thus, habitat modelling has been  
107 widely used to project the past, present, and future biogeography across various marine organisms,  
108 from zooplankton to fishes (e.g., 31). However, omics-based habitat modelling is still an emerging  
109 field to explore functional and taxonomic biogeography associated with unicellular planktonic  
110 organisms (32–34). Building on the above-mentioned properties associated with MAGs, habitat  
111 modelling is transferable to genomic potential, thus exploring the quantitative response of the  
112 associated taxonomic and functional gene annotations to environmental conditions.  
113

114 Here, complementing recent studies on prokaryote - environment relationships (32), we provide an  
115 original, machine learning-based, comprehensive, and reproducible framework to derive the  
116 biogeography of the genomic potential related to metabolic functions, from metagenomic-based  
117 relative abundances data. Using Multivariate Boosted Tree Regressors (35), we simultaneously  
118 project the biogeography of selected genomic functional annotations, while accounting both for  
119 their interactions and environmental responses. We applied this framework to metagenome-based  
120 Protein Functional Clusters (PFCs; hereafter referred to as “clusters”) linked to RUBISCO and C4-  
121 enzymes only, in marine picoeukaryotes. Compared to a more traditional approach (i.e., searching  
122 reads in a functional database using sequence similarity), our methodology combining MAGs and  
123 PFCs offers several advantages. The quantitative signal resulting from a MAG is (i) standardized  
124 by the genome length and (ii) correspond to a taxonomic identity. Combined in PFCs, (iii) it also  
125 includes the fraction of signal corresponding to not yet annotated genes. Thus, this approach offers  
126 a more robust quantitative framework than traditional approaches, representative of eukaryotic  
127 plankton diversity in open oceans (39.1 billion reads recruited, ~97% identity, ~25 Gbp; , 28) and  
128 transferable to a variety of functions or enzymes of interest using the already computed PFC  
129 network. Finally, habitat modeling provides an interesting tool to estimate the response and co-  
130 dominance patterns of C4-enzymes and RUBISCO to environmental conditions representative of  
131 the global ocean, conversely to estimates from the samples only, that might be driven by sampling  
132 and associated environmental biases.  
133

## 134 RESULTS

### 136 2.1. C4-CCM enzymes across sampled stations

137  
138 From the *Tara Oceans* eukaryotic MAGs, ~1.2 million clusters were built, for which 349 are related  
139 to RUBISCO or C4-enzymes (**Fig. S1, Table S1**). This dataset corresponds to 817 unique genes,  
140 with a median observed presence across 45 sampled stations per cluster. To avoid considering  
141 enzymes related to other metabolic functions, we only selected those related to RUBISCO or C4-  
142 enzymes only, corresponding to 240 clusters, distributed across the world Ocean except the Arctic,  
143 western Pacific and to a lesser extent Southern Ocean (**Figure 1**). The successive cluster selection  
144 criteria (i.e., PFCs exclusive to RUBISCO or C4-enzymes, minimum presence at 10 sampling  
145 stations) did not present significant effects on the distribution of clusters across number of reads,  
146 number of genes and taxonomic classes (**Fig. S3**). In contrast, we observed a loss of signal for the  
147 MDCs (-NAD and -NADP), between functionally exclusive and non-exclusive clusters, highlighting  
148 an important fraction of sequence homologs for these enzymes (**Fig. S3**).  
149

150

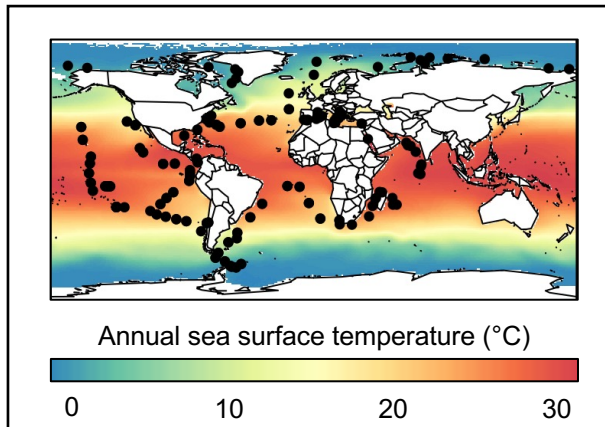

151

152

153

154

155

156

157

158

159

160

161

162

163

164

165

166

167

168

169

170

171

172

173

174

175

176

177

178

179

180

181

182

183

184

185

186

187

188

189

190

**Figure 1.** Location of the *Tara Oceans* (TO) sampling stations, represented as black dots. Annual sea surface temperature from World Ocean Atlas (Boyer et al. 2018) are represented in background.

## 2.2. Standardized distribution of the genomic potential related to C4-photosynthesis

Here we present projections for each C4-enzyme and RUBISCO. First, we rescaled the cluster-level projections (i.e., model outputs; **Fig. S1D**) between 0 and 1 (i.e., distribution patterns, **Fig. S2**). Then, we aggregated these patterns at the enzyme-level according to their respective functional annotation. We therefore alleviated the propagation of the observed dominance of a given cluster to the aggregated enzyme-level patterns. The resulting enzyme-level projections are referred to as standardized patterns. For each enzyme, it represents a prediction of the genomic potential according to the environmental conditions at each geographical location, and independently of any taxonomic dominance.

Because most C4-enzymes are involved in several acid-decarboxylation types, we cannot directly infer their corresponding distribution. However, MDC - NAD, MDC - NADP and PEPCK are considered representative of their respective acid-decarboxylation types. We predicted similar standardized patterns (**Figure 2**) for all acid decarboxylation types and RUBISCO. The standardized patterns of all C4-enzymes presented medium to high pairwise Pearson's correlation (0.5 to 0.9), except MDC - NAD and GOT which are weakly correlated (0.3).

We predicted a high genomic potential ( $> 0.6$ ) for all standardized patterns in temperate to tropical latitudes, with an associated coefficient of variation below 30 % (**Figure 2A**). We also predicted a high potential ( $> 0.8$ ) for RUBISCO and PEPDK for temperate to tropical waters only. In contrast, the potential for PEPC, GOT, MDCs and MDHs were high in equatorial latitudes. These patterns suggest a higher affinity of the genomic potential of C4-enzymes for the equatorial ocean, in comparison to RUBISCO. Furthermore, we predicted low-to-moderate potential (between 0 and 0.4) in high latitudes (i.e., above polar circles) for all standardized patterns (**Figure 2A**). Predictions in such latitudes also present important calibration and projection-related variability, with coefficients of variations ranging from 30 to 100 % (e.g., for the MDH - NADP and PEPCK). Therefore, our genomic potential predictions remain inconclusive in high latitudes, also subject to lower sampling coverage.

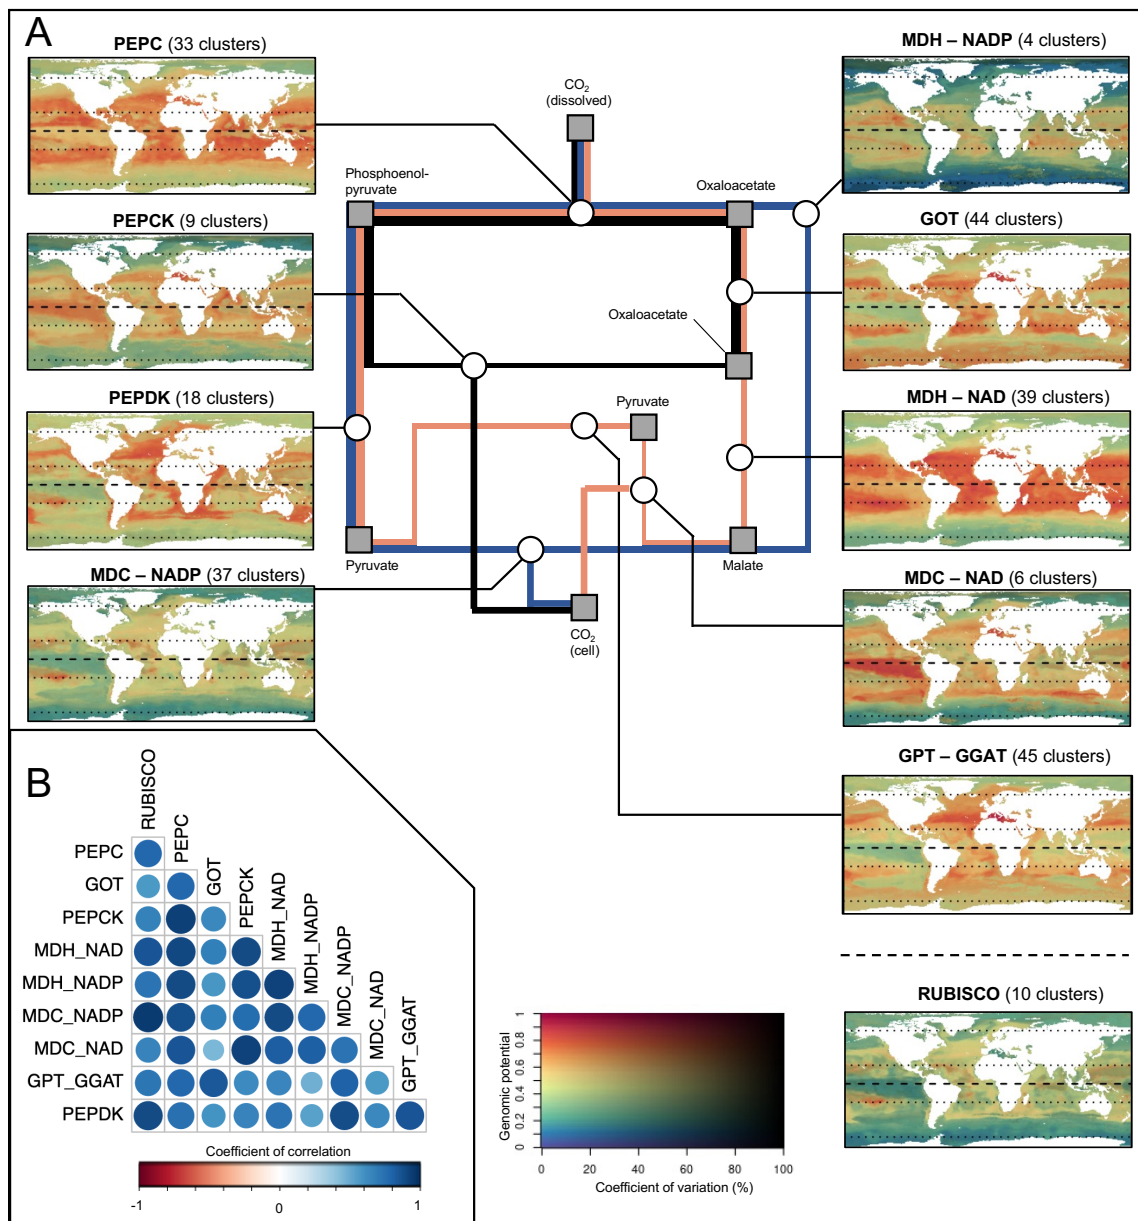

192  
193

**Figure 2.** Standardized patterns corresponding to the relative genomic potential supporting C4-enzymes and RUBISCO. **(A)** Synthetic diagram of the metabolic pathway and corresponding projections. **(B)** Inter-projections Pearson's spatial correlation index. The three main currently described acid-decarboxylation types are represented in blue (MDC-NADP), red (MDC-NAD) and black (PEPCK), respectively. Involved metabolic components and enzymes are indicated on the diagram by squares and circles, respectively. The 2D color scale represents the standardized genomic potential for the target enzyme as the hue value (Y-axis) and the associated coefficient of variation as the saturation (i.e., uncertainty in % of the mean; X-axis). An orange to red hue corresponds to region where environmental conditions yield a high proportion (>0.6) of the target genes in the model. A low saturation level corresponds to an important variance among the underlying cluster-level projections.

205  
206  
207  
208  
209  
210  
211  
212  
213  
214  
215  
216  
217  
218  
219  
220  
221  
222  
223  
224  
225  
226  
227  
228  
229  
230  
231  
232  
233  
234  
235  
236  
237  
238  
239  
240  
241  
242  
243  
244  
245  
246  
247  
248  
249  
250  
251  
252  
253  
254  
255  
256  
257  
258

The environmental variables importance in the trained model (**Fig. S4**) highlighted the predominant roles of dissolved oxygen concentration (contributing to 34% of the explained variance) and the yearly variability (i.e., inter-month standard deviation) in Salinity (29%) and, to a lesser extent, of oxygen saturation, chlorophyll a concentration and temperature. Furthermore, we revealed a strong affinity (i.e., maximum potential) of most standardized patterns (**Fig. S5**) for tropical, oligotrophic conditions (e.g., temperature between 15 to 30 °C; phosphate concentration below 0.5 μmol/kg). However, we predicted different responses to the variability in Chlorophyll a concentration and euphotic zone depth across enzymes (**Fig. S5**). Finally, we highlighted no taxonomic dominance across world oceans, according to the taxonomic composition associated to each cluster, suggesting a worldwide functional redundancy in the genomic potential supporting C4-enzymes (**Fig. S7**).

### 2.3. Weighted distribution of the genomic potential related to C4-photosynthesis

Here we present projections for each C4-enzyme and RUBISCO. First, we rescaled the cluster-level projections (i.e., model outputs; **Fig. S1D**) by their observed metagenomic read abundance (i.e., weighted distribution patterns, **Fig. S2**). Then, we aggregated these patterns at the enzyme-level according to their respective functional annotation. We therefore propagate the observed dominance of a given cluster (i.e., and associated taxa) to the aggregated enzyme-level patterns. The resulting enzyme-level projections are referred to as weighted patterns. For each enzyme, it represents the corresponding genomic potential (i.e., relative to the other considered enzymes), according to the environmental conditions at each geographical location.

We predicted contrasted weighted patterns between RUBISCO and across acid decarboxylation type (**Figure 3A**). Indeed, the weighted pattern of RUBISCO presented maximum potential in temperate areas (**Figure 3B**).

We predicted low-to-moderate potential (< 0.3) and moderate (~ 30 %) uncertainty in high latitudes for the weighted patterns of PEPC, MDCs, MDHs, and transferases (i.e., GOT and GPT – GGAT; **Figure 3A**). These patterns also presented moderate-to-high potential (between 0.5 and 1) in tropical areas, with some discrepancies. We show a Pearson's correlation index above 0.5 between the above-mentioned enzymes, and above 0.7 for GOT and MDHs (**Figure 3B**). The latter presented an important potential in oligotrophic regions (e.g., Pacific gyres), suggesting functional redundancy in the genomic potential from Oxaloacetate to Malate (**Figure 3A**). In contrast, we predicted a high potential (> 0.7) in eutrophic Pacific waters for the weighted patterns of MDCs (Pearson's correlation above 0.7; **Figure 3A**). Overall, we show high confidence in the areas associated to high genomic potential, with coefficient of variations lower than 30 % among all trained algorithms and 100-bootstrap projections. The above-mentioned weighted responses to environmental variables are similar to the ones highlighted in section 3.1., characterized by higher potential in warm, low seasonality, and generally oligotrophic water bodies (**Fig. S4** and **S6**).

Conversely, we predicted moderate to high intensity values in oligotrophic tropical areas, but most importantly in the Southern Ocean (> 0.5; **Figure 3**) for the weighted pattern of PEPCK (i.e., a different acid decarboxylation type). The latter was preferentially distributed along water bodies characterized by (i) high seasonality of the Chlorophyll a concentration and the depth of the euphotic zone, (ii) high concentrations of oxygen (presenting the highest explanatory power in the model training; **Fig. S4**) and nutrients (e.g., phosphates and nitrates) and (iii) average temperatures below 8 °C (**Fig. S6**).

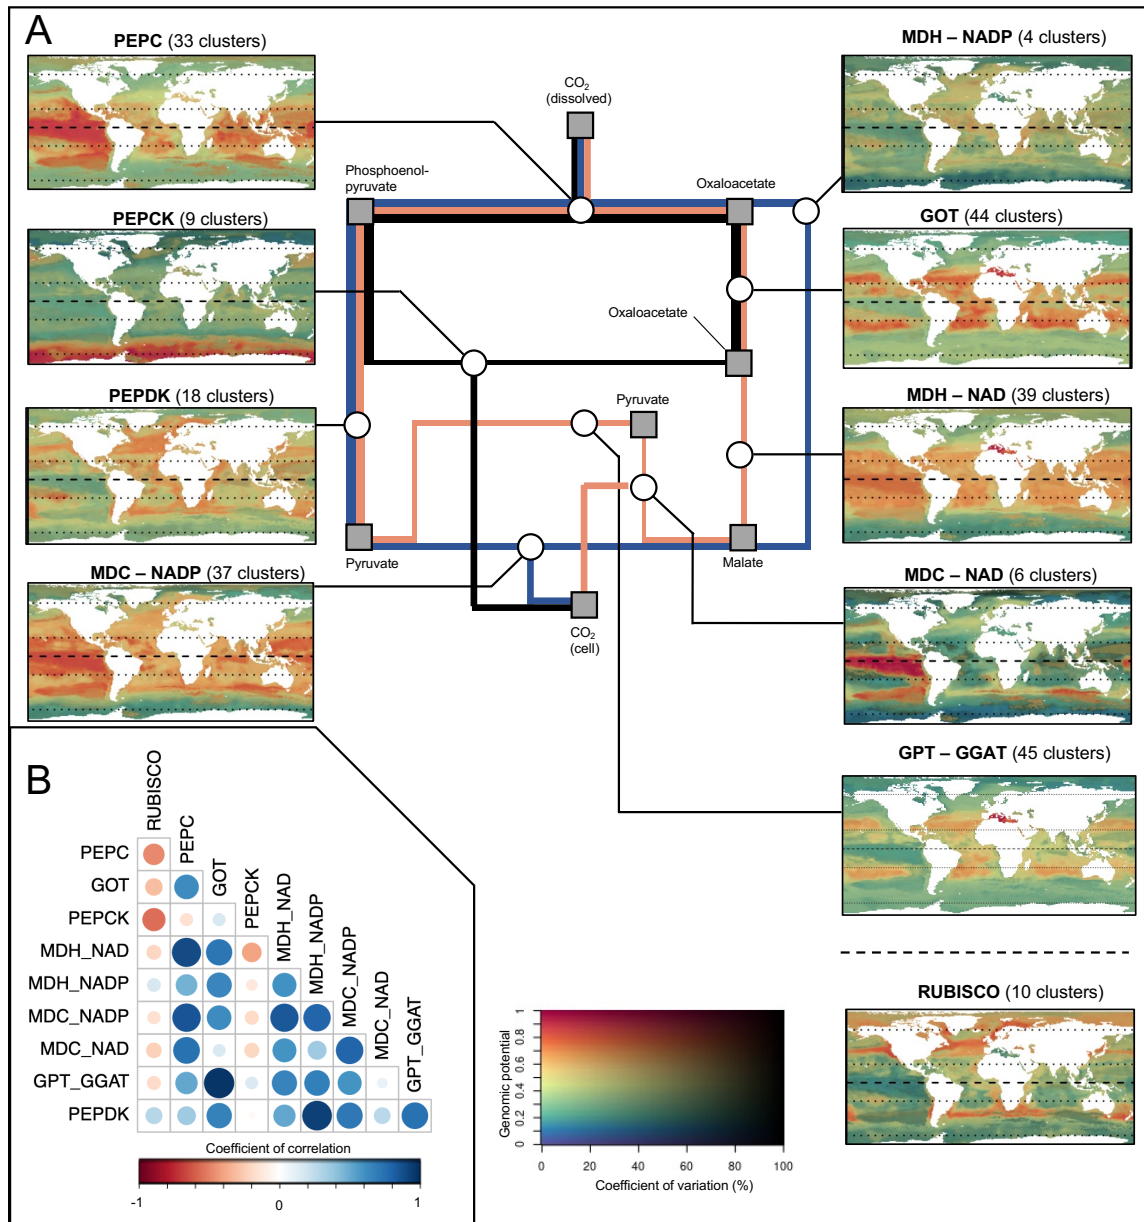

259  
 260  
 261  
 262  
 263  
 264  
 265  
 266  
 267  
 268  
 269  
 270  
 271  
 272

**Figure 3.** Weighted patterns corresponding to the relative genomic potential supporting C4-enzymes and RUBISCO, re-scaled by the corresponding observed relative metagenomic reads abundance. **(A)** Synthetic diagram of the metabolic pathway and corresponding projections. **(B)** Inter-projections Pearson's spatial correlation index. The three mains currently described acid-decarboxylation types are represented in blue (Malate-NADP), red (Malate-NAD) and black (PEPCK), respectively. Involved metabolic components and enzymes are indicated on the diagram by squares and circles, respectively. The 2D color scale represents the weighted genomic potential for the target enzyme as the hue value (Y-axis) and the associated coefficient of variation as the saturation (i.e., uncertainty in % of the mean; X-axis). An orange to red hue corresponds to region where environmental conditions yield a high proportion (>0.6) of the target genes in the model. A low saturation level corresponds to an important variance among the underlying cluster-level projections.



273  
274 Finally, we highlighted that weighted patterns associated with high latitudes (e.g., correlated with  
275 the one of PEPCK) were composed at 28 % of Prymnesiophyceae and 50 % of Mamiellophyceae  
276 (Shannon index of 1.5), based on the taxonomic composition of each cluster. Mamiellophyceae  
277 also composed 40 % of the patterns with a clear temperate affinity (e.g., correlated with the one of  
278 RUBISCO; **Fig. S8**). In contrast, we highlight a larger diversity of taxonomic classes, with a  
279 Shannon index of 2.1, for patterns associated with equatorial latitudes.

## 280 281 **DISCUSSION**

### 282 283 3.1. Genomic potential for C4-CCM in picoeukaryotes

284  
285 By selecting clusters (i.e., PFCs) annotated by C4-enzymes or RUBISCO only, we considered a  
286 fraction of the available metagenomic information (i.e., ~67 % of the clusters related to C4-enzymes  
287 or RUBISCO). In addition, genes related to other metabolic pathways may have responses to  
288 environmental variables different from genes related to C4-enzymes, potentially including bias in  
289 their corresponding PFC's projection. Therefore, selecting a reduced set of clusters alleviates the  
290 risk of metabolic noise in the environmental responses, limited to the effect of C4-enzymes  
291 potentially involved in other pathways (e.g., GPT-GGAT transporter).

292  
293 Our study focused on planktonic picoeukaryotes, the photosynthetic fraction of which is generally  
294 dominated by the Mamiellophyceae, Prasinophyceae, Prymnesiophyceae, Bacillariophyceae, and  
295 Dinophyceae lineages in the open ocean (16, 20). The potential for C4-photosynthesis has been  
296 suggested for several families, including Bacillariophyceae by combining C4-enzyme inhibition and  
297 photosynthetic efficiency monitoring (e.g., PEPDK 36, PEPC and PEPCK, 37). Evidence for genes  
298 encoding all C4-enzymes exist in *Micromonas* and *Ostreococcus*, Mamiellophyceae (38, 39). A  
299 plastid PEPC enzyme was recently discovered in *Emiliana huxleyi* (38), a Prymnesiophyceae  
300 abundant in temperate and polar regions (40). However, to our knowledge, no study provided  
301 univocal evidence for C4-CCM usage in situ. Stable isotope measurements would be necessary to  
302 fully understand C4-photosynthesis in picoeukaryotes, but they are difficult to apply at species-level  
303 in natural, uncultured, plankton communities (e.g., 8, 10). Alternatively, recent literature suggests  
304 the need for further studies on deep chlorophyll a maxima and various transporters (e.g.,  
305 bicarbonate transporters), some of which are associated with or specific to C4 metabolism, to better  
306 understand C4-CCM in natural populations (5, 6).

307  
308 Complementing these experimental approaches, we use a data-driven approach to shed more light  
309 on the environmental drivers of C4-genes in marine picoeukaryotes. However, MAGs integrate  
310 chloroplast and mitochondrial genes corresponding to C4-enzymes but do not distinguish their  
311 origin (28), nor provide information on the subcellular location of the corresponding enzymes (9,  
312 41). Therefore, the patterns presented here must be interpreted as the potential for the (co-)  
313 presence of those pathways in the genome. They should be complemented by culture-based  
314 studies, locating enzymes within cells and/or performing carbon isotope discrimination to confirm  
315 C4-CCM presence, expression, and its co-existence with C3-photosynthesis in picoeukaryote  
316 lineages (8). The present study could be used to locate regions where such mechanisms are most  
317 likely to occur.

### 318 319 3.2. Environment-driven genomic potential

320  
321 The modeled distribution patterns revealed that the genomic potential for C4-photosynthesis is  
322 more associated with tropical oligotrophic and annually stratified waters. Conversely, the proportion  
323 of reads related to RUBISCO (i.e., considered as a representative of all photosynthetic pathways,  
324 due to its central role in C3, C4 and CAM photosynthesis) is higher in temperate regions (**Figure**  
325 **2A**). The fact that terrestrial C4-plants (4) and the genomic potential for C4-CCM in picoeukaryotes  
326 display similar latitudinal distribution, around the tropics, does not imply that the environmental

327 drivers of those distributions are the same. In terrestrial plants, C4-CCMs are considered as an  
328 adaptation to drought and are, for example, also associated with a specific leaf structure that  
329 reduces their water consumption (4). Drought is of course not an evolutionary driver for marine  
330 picoeukaryotes. Alternatively, they present an important surface-to-cytoplasm ratio (i.e., small cells  
331 or presence of a vacuole, 42, 43) leading to a high nutrient absorption yield, which is adapted to  
332 oligotrophic waters, common in the tropical ocean.

333  
334 In addition to environmental conditions, the biogeography of the genomic potential supporting C4-  
335 CCM may also relate to irradiance levels, largely controlling ATP generation, necessary to the  
336 decarboxylation reaction (42). Indeed, C4-CCM requires additional ATP generation to increase the  
337 RUBISCO efficiency in comparison to classical C3-photosynthesis, without impacting the energy  
338 available for the latter (42, 44). In contrast, an excess of ATP may lead to photoinhibition, thus  
339 lower carbon fixation efficiency (36, 45). Therefore, it has been suggested that C4-photosynthesis  
340 is particularly adapted to dissipate excess energy in the cell in high irradiance areas such as tropical  
341 oceans (5, 36). Our weighted patterns highlighted differences between PEPCK and MDCs (**Figure**  
342 **3**). The latter require 2 extra ATP compared to the C3 carbon fixation to complete the pathway. In  
343 a logical way, the PEPCK acid decarboxylation type, which only requires 1 extra ATP and thus is  
344 supposed to be more efficient in low irradiance environments (44), showed here the highest  
345 genomic potential in polar or sub-polar regions.

346

### 347 3.3. Functional and ecological implications

348

349 We highlighted functional redundancy among C4-genes in oligotrophic tropical waters (**Fig. S7**).  
350 This contrasts with high latitudes, where only a few taxa dominate (**Fig. S8**) (17, 46). More  
351 interestingly, we highlighted a biogeographical differentiation between the weighted pattern of  
352 RUBISCO – i.e., the baseline photosynthetic enzyme – and those of C4-enzymes. Since 30 million  
353 years ago, atmospheric CO<sub>2</sub> concentration has drastically reduced from c.a. 1000 ppm to less than  
354 200 ppm 20.000 years ago, resulting in lower dissolved carbon in the oceans (4). This led to a  
355 selective pressure towards efficient photosynthetic metabolism, like C4-photosynthesis (7) or, in a  
356 lesser extent, RUBISCO of higher carboxylation affinity (e.g., type II in Dinoflagellates, 9). While  
357 the evolution of C4-CCM in marine organisms is not yet fully understood, 48 independent evolutions  
358 of C4-CCM were identified in the genome of terrestrial plants (e.g., grasses, Caryophyllales, 4),  
359 suggesting a higher genomic potential for C4-photosynthesis in taxonomically diverse areas (7).  
360 The above-mentioned functional redundancy in the genomic potential for C4-CCM in taxonomically  
361 rich tropical waters may relate to a co-evolution between taxonomic diversification and its  
362 associated functions (i.e., neutral theory). However, the functional diversity among C4 acid-  
363 decarboxylation types may also reflect – or be amplified by – a selection process, as it may present  
364 a selective advantage. Moreover, the respective dominance of Mamiellophyceae in temperate  
365 latitudes (i.e., correlated with the patterns associated to RUBISCO) and Prymnesiophyceae in polar  
366 latitudes, are concordant with the literature (40, 47), thus validating the environmental predictors  
367 controlling their biogeography. We identified key environmental predictors shaping the  
368 biogeography and (co-)dominance patterns of the genomic potential supporting C4-enzymes and  
369 RUBISCO. Such results open new perspectives of exploring the relationship between functional  
370 and taxonomic diversity in the oceans, complementing already diverse approaches and data types,  
371 and better understand the environmental drivers of key biogeochemical cycles in the current and  
372 future climatic context.

373

## 374 **MATERIAL AND METHODS**

375

### 376 4.1. Data

#### 377 4.1.1. Genomic data

378

379 We studied the biogeography of the genomic potential related to C4-CCM through the prism of  
380 Metagenomic Assembled Genome (MAG, 28) retrieved from the *Tara Oceans* expedition (2009-

2013). Briefly, 280 billion reads from 798 metagenomes, corresponding to the surface and deep chlorophyll maximum layer of 210 stations from the Pacific, Atlantic, Indian, Southern and Arctic Oceans, as well as the Mediterranean and Red Seas (**Figure 1**), encompassing eukaryote-enriched plankton size fractions ranging from 0.8  $\mu\text{m}$  to 2 mm, were used as inputs for 11 metagenomic co-assemblies (6–38 billion reads per co-assembly) using geographically bounded samples. We thus created a culture-independent, non-redundant (average nucleotide identity <98%) genomic database for eukaryotic plankton in the sunlit ocean consisting of 683 MAGs and 30 single-cell genomes (SAGs), all containing more than 10 million nucleotides for a total size of 25.2 Gbp and encoding for 10,207,450 genes. Then, a sequence similarity network was built out using the 683 manually curated MAGs following a similar methodology to the one developed in Faure et al. (32). A pairwise comparison was computed between each protein sequence. The resulting alignment was then filtered, removing self-hits and pairs showing less than 80% of sequence identity and coverage. Resulting Protein Functional Clusters (PFCs, as in 32) were built, hereafter referred to as clusters. The functional annotation performed with eggNOG mapper v2.1.5 was added on the sequences, and the functional homogeneity was checked in each cluster (48, 49). The surface and metagenomic samples correspond to 130 stations.

397  
398  
399

#### 4.1.2. Environmental data

400 For each of the 130 selected *Tara Oceans* metagenomic surface samples, we retrieved a set of  
401 monthly, global scale, environmental climatologies encompassing the 2005 to 2017 period, at a  
402 spatial resolution of  $1^\circ \times 1^\circ$  (**Table S2**). The latter corresponds to the available climatology  
403 encompassing the sampling period (2009-2013), where we considered temporal environmental  
404 variations negligible in comparison to spatial environmental gradients. They correspond to a  
405 restricted set of factors characterizing the water body (e.g., oligotrophic, eutrophic) and related to  
406 C4-photosynthesis, for which we calculated the yearly average and yearly standard deviation (i.e.,  
407 proxy of seasonal variations).

408  
409

#### 4.2. Data selection and pre-processing

410  
411

##### 4.2.1. Protein functional cluster selection

412 We first selected a reduced set of clusters, within the 0.8 to 5  $\mu\text{m}$  size fraction and surface samples,  
413 for which 100% of the KEGG Orthology (KO, 50) annotated protein members were related to C4-  
414 enzymes or RUBISCO (**Fig. S1, Table S1**). To avoid model over-parameterization and because  
415 rare clusters were assumed as not influencing the large-scale patterns investigated in this study,  
416 we only considered clusters that were present in a minimum of 10 *Tara Oceans* stations.

417  
418

419 The corresponding dataset contained 240 clusters distributed across 130 *Tara Oceans* stations.  
420 The 240 clusters, functionally annotated with C4-enzymes and RUBISCO, were associated with  
421 234 MAGs. The latter presented an average completeness estimate of 57% (**Table S3**). In  
422 comparison, the average completeness estimate across all MAGs from Delmont et al. (28) yield at  
423 37 %. As a supplementary quality check, we estimated a minimum horizontal coverage (i.e.,  
424 number of bases of a MAG covered with a certain depth) of 68 % for each of the 234 MAGs (**Table**  
425 **S3**). Finally, we show that our MAGs are associated with an average BUSCO completeness (i.e.,  
426 the percentage of mapped BUSCO genes in each MAG) of 55.7% (**Table S3**). We therefore  
427 consider these MAGs of sufficient quality for identifying C4-genes across our samples.

428  
429

430 To reduce the number of response variables (clusters; PFCs) to a reasonable amount for  
431 multivariate modelling, with respect to the limited number of stations, we performed an Escoufier  
432 dimensional reduction (51). The latter iteratively selects the clusters whose pattern across stations  
433 minimize the residual variance of the dataset. Here, we selected 50 clusters that represent over  
434 95% of the 240 clusters variance to be included in the multivariate algorithm.

433  
434

#### 435 4.2.2. Metagenomic data pre-processing

436

437 Genes abundances among samples were determined by mapping raw metagenomic reads against  
438 the gene database (28). Briefly, reads were mapped using the bwa tool, and only random best  
439 matches with at least 95% of sequence identity over at least 80% of the read length were retained  
440 as positive. To alleviate the effect of gene length and sequencing effort variability between samples  
441 on the number of reads, we normalized the metagenomic reads by the length of the corresponding  
442 gene coding part and the total number of reads per station (i.e., including reads of all non-  
443 considered clusters), respectively. Because the total genomic material present at each sampling  
444 station is unknown (i.e., non-exhaustive sampling and sequencing effort), the absolute number of  
445 reads is not comparable among stations. To compare the abundance between selected clusters at  
446 different sampling stations, we transformed the dataset to relative abundance (**Supplementary**  
447 **information text** and **Fig. S1**).

448

#### 449 4.3. Multivariate Boosted Regression Tree

##### 450 4.3.1. General principle

451

452 Recently, growing interest for interactions between response variables led to the development of  
453 multivariate machine learning algorithms, such as Multivariate Boosted Tree Regressors (MBTR,  
454 35). The latter is also particularly adapted to small sample size as the interactions between  
455 response variables is considered as supplementary information to calibrate the model. Here, MBTR  
456 is used to model the relationship between climatologies and metagenomic relative abundance (i.e.,  
457 summed at 1 for each station; **Supplementary information text** and **Fig. S1**). To best reproduce  
458 the response of metagenomic reads (i.e., response variable) to the corresponding environmental  
459 variables (i.e., explanatory variable), the model sequentially fits decision trees (i.e., boosting  
460 rounds) using gradient descent to minimize a specific loss function (see **Supplementary**  
461 **information text** for hyperparameter and loss choice). At each boosting round, the algorithm fits a  
462 decision tree on the residuals of the previous boosting round and computes a tree loss (i.e., a  
463 measure of deviation between observed and predicted response variable values). Decision trees  
464 are constructed using the hessian of the loss function (i.e., second order tensor of its partial  
465 derivatives) to minimize the loss gradient. Therefore, the information learned by the  $n^{th}$  tree is  
466 passed to the  $n+1^{th}$  tree at a user-defined learning rate (**Supplementary information text** and **Fig.**  
467 **S1**). The ensemble of sequentially fitted decision trees are considered in the model until the  
468 minimum loss is reached. Finally, one important feature of MBTR is the conservation of the initial  
469 correlation structure between the response variables (see methods in 35). The latter is tested by  
470 computing a Pearson correlation matrix between response variables before and after model fitting,  
471 whose conservation is tested by a Mantel matrix comparison test (**Supplementary Information**  
472 **text**).

473

##### 474 4.3.2. Model training and evaluation

475

476 To avoid over-fitting, the explanatory and response datasets were split between training set and  
477 test set using a  $n$ -fold cross-validation procedure. For each model,  $n$  algorithms were trained on  
478 different  $n-1$  folds, while the remaining fold was used for testing only (i.e., computing the loss at  
479 each boosting round). To minimize the effect of spatial and temporal autocorrelation in our data  
480 (i.e., leading to over-optimistic model evaluation, 52), the  $n$ -folds were defined according to the  
481 *Tara Oceans* station number. Because the cruise followed a continuous trajectory in time and along  
482 the sampled stations, the resulting folds are spatially and temporally distant (i.e., spatial and  
483 temporal block splitting, as recommended in 52). The resulting  $n$ -algorithms predictions were  
484 aggregated in an average response and its corresponding coefficient of variation (CV). The ability  
485 of the final model to reproduce the observed clusters relative abundance across environmental  
486 conditions has been measured by the  $R^2$  criteria and the root mean square error (RMSE, between  
487 0 and 1 according to the distribution pattern scale).

488

489 *4.3.3. Spatial projections*

490

491 To better estimate projection uncertainty, our spatial projections were constructed using a bootstrap  
492 procedure. For each 100-bootstrap round, we first re-sampled the original dataset (i.e., train and  
493 test response dataset and corresponding explanatory variable values) with replacement. Then, we  
494 re-fitted an MBTR algorithm on the re-sampled data by using the hyperparameters corresponding  
495 to the validated model, including the number of boosting rounds corresponding to the minimum loss  
496 across all  $n$ -algorithms. Finally, the re-fitted MBTR algorithm was used to predict the relative  
497 abundance of clusters worldwide, using the corresponding climatologies values at each  
498 geographical cell.

499

500 4.4. From model projections to final outputs

501

502 We only modelled the 50 clusters representing 95% of the dataset variability. Therefore, we  
503 indirectly reconstructed the projections of the 190 others by identifying their most representative  
504 Escoufier-selected cluster. To this extent, we performed a correspondence analysis based on the  
505 observed relative abundance of all clusters. By using the dimensions of the correspondence  
506 analysis space corresponding to a minimum of 80% variance explained, we calculated the  
507 Euclidean distance between each non-selected cluster, and its nearest neighbor selected by the  
508 Escoufier criteria. Because the 50 Escoufier selected clusters represented over 95% of the dataset  
509 variability, we considered that a cluster and its nearest neighbor in the correspondence analysis  
510 space share the same relative abundance pattern. In addition, we calculated the scale of each non-  
511 selected cluster with respect to their nearest Escoufier-selected neighbors using the sum of their  
512 observed relative abundance across all stations (**Fig. S2**). We then reconstructed the spatial  
513 projections of the 190 clusters not considered in MBTR according to their projected nearest  
514 Escoufier-selected neighbor. The resulting 240 cluster-level projections of the genomic potential  
515 were then aggregated at the enzyme level according to their functional annotation (see Result  
516 section, **Fig. S2**).

517

518

519

520

### **Acknowledgments**

521

The co-authors wish to thank public taxpayers who fund their salaries. A.S. and P.D.'s salaries were financed by the Blue-Cloud European project (Grant Agreement n.862409). The authors want to thank all people involved in the Tara Oceans project for making data publicly available. Finally, the authors wish to thank the editor and the three anonymous reviewers for their helpful comments on this manuscript.

526

527

### **Fundings:**

528

This work was funded by the Blue-Cloud project, through the European Union's Horizon program call BG-07-2019-2020, topic: [A] 2019 - Blue Cloud services, Grant Agreement n.862409

529

530

531

### **Author Contributions:**

532

S.D.A., L.G. and J.O.I. conceived the study. L.G. and J.O.I. supervised the study. P.D., L.B. and E.P. processed the metagenomic data and provided expert advice on their use and interpretation. A.S. wrote the first draft, the modelling pipeline and performed the analysis. All authors substantially contributed to the successive versions of this manuscript.

533

534

535

536

537

### **Competing Interests:**

538

The authors have no competing interests.

539

540

### **Data availability**

541

Instructions on how to build the Sequence Similarity Network and associated Protein Functional Clusters are available at: <https://data.d4science.net/BN9t> . Instructions and credentials on how to access the genomic database used in this study (PostgreSQL) are available in the technical documentation at <https://data.d4science.net/qa7Z> .

542

543

544

545

The ensemble of enzyme-level projections are available upon registration at [\[https://data.d4science.net/Zraq\]](https://data.d4science.net/Zraq). Additional data that support the findings of this study are available from the corresponding author upon reasonable request.

546

547

548

549

### **Code availability**

550

All R and Python codes, the corresponding pipeline, libraries, and associated technical documentation are available in the Blue-Cloud catalogue at: <https://data.d4science.net/qa7Z>

551

552

553  
554  
555

## REFERENCES

- 556 1. Y. M. Bar-On, R. Milo, The global mass and average rate of rubisco. *Proc. Natl. Acad. Sci.*  
557 **116**, 4738–4743 (2019).
- 558 2. P. M. Shih, *et al.*, Biochemical characterization of predicted Precambrian RuBisCO. *Nat.*  
559 *Commun.* **7**, 10382 (2016).
- 560 3. T. J. Erb, J. Zarzycki, A short history of RubisCO: the rise and fall (?) of Nature’s  
561 predominant CO<sub>2</sub> fixing enzyme. *Curr. Opin. Biotechnol.* **49**, 100–107 (2018).
- 562 4. R. F. Sage, T. L. Sage, F. Kocacinar, Photorespiration and the Evolution of C<sub>4</sub>  
563 Photosynthesis. *Annu. Rev. Plant Biol.* **63**, 19–47 (2012).
- 564 5. J. J. Pierella Karlusich, C. Bowler, H. Biswas, Carbon Dioxide Concentration Mechanisms  
565 in Natural Populations of Marine Diatoms: Insights From Tara Oceans. *Front. Plant Sci.* **12** (2021).
- 566 6. R. T. Furbank, Evolution of the C<sub>4</sub> photosynthetic mechanism: are there really three C<sub>4</sub>  
567 acid decarboxylation types? *J. Exp. Bot.* **62**, 3103–3108 (2011).
- 568 7. R. F. Sage, M. Stata, Photosynthetic diversity meets biodiversity: The C<sub>4</sub> plant example.  
569 *J. Plant Physiol.* **172**, 104–119 (2015).
- 570 8. M. Giordano, J. Beardall, J. A. Raven, CO<sub>2</sub> CONCENTRATING MECHANISMS IN ALGAE:  
571 Mechanisms, Environmental Modulation, and Evolution. *Annu. Rev. Plant Biol.* **56**, 99–131  
572 (2005).
- 573 9. J. R. Reinfelder, Carbon Concentrating Mechanisms in Eukaryotic Marine Phytoplankton.  
574 *Annu. Rev. Mar. Sci.* **3**, 291–315 (2011).
- 575 10. P. D. Tortell, G. H. Rau, F. M. M. Morel, Inorganic carbon acquisition in coastal Pacific  
576 phytoplankton communities. *Limnol. Oceanogr.* **45**, 1485–1500 (2000).
- 577 11. E. Derelle, *et al.*, Genome analysis of the smallest free-living eukaryote *Ostreococcus*  
578 *tauri* unveils many unique features. *Proc. Natl. Acad. Sci.* **103**, 11647–11652 (2006).
- 579 12. A. Z. Worden, *et al.*, Green Evolution and Dynamic Adaptations Revealed by Genomes of  
580 the Marine Picoeukaryotes *Micromonas*. *Science* **324**, 268–272 (2009).
- 581 13. Y. Tsuji, I. Suzuki, Y. Shiraiwa, Enzymological Evidence for the Function of a Plastid-  
582 Located Pyruvate Carboxylase in the Haptophyte alga *Emiliania huxleyi*: A Novel Pathway for the  
583 Production of C<sub>4</sub> Compounds. *Plant Cell Physiol.* **53**, 1043–1052 (2012).
- 584 14. E. Granum, J. A. Raven, R. C. Leegood, How do marine diatoms fix 10 billion tonnes of  
585 inorganic carbon per year? *Can. J. Bot.* **83**, 898–908 (2005).
- 586 15. A. Z. Worden, F. Not, “Ecology and Diversity of Picoeukaryotes” in *Microbial Ecology of*  
587 *the Oceans*, D. L. Kirchman, Ed. (John Wiley & Sons, Inc., 2008), pp. 159–205.

- 588 16. C. de Vargas, *et al.*, Eukaryotic plankton diversity in the sunlit ocean. *Science* **348**,  
589 1261605 (2015).
- 590 17. F. M. Ibarbalz, *et al.*, Global Trends in Marine Plankton Diversity across Kingdoms of Life.  
591 *Cell* **179**, 1084-1097.e21 (2019).
- 592 18. A. Obiol, *et al.*, A metagenomic assessment of microbial eukaryotic diversity in the  
593 global ocean. *Mol. Ecol. Resour.* **20**, 718–731 (2020).
- 594 19. R. Massana, Eukaryotic Picoplankton in Surface Oceans. *Annu. Rev. Microbiol.* **65**, 91–  
595 110 (2011).
- 596 20. X. L. Shi, D. Marie, L. Jardillier, D. J. Scanlan, D. Vaulot, Groups without Cultured  
597 Representatives Dominate Eukaryotic Picophytoplankton in the Oligotrophic South East Pacific  
598 Ocean. *PLoS ONE* **4**, 11 (2009).
- 599 21. S. Pesant, *et al.*, Open science resources for the discovery and analysis of Tara Oceans  
600 data. *Sci. Data* **2**, 150023 (2015).
- 601 22. S. Sunagawa, *et al.*, Tara Oceans: towards global ocean ecosystems biology. *Nat. Rev.*  
602 *Microbiol.* **18**, 428–445 (2020).
- 603 23. C. M. Duarte, Seafaring in the 21st Century: The Malaspina 2010 Circumnavigation  
604 Expedition. *Limnol. Oceanogr. Bull.* **24**, 11–14 (2015).
- 605 24. S. J. Biller, *et al.*, Marine microbial metagenomes sampled across space and time. *Sci.*  
606 *Data* **5**, 180176 (2018).
- 607 25. L. P. Coelho, *et al.*, Towards the biogeography of prokaryotic genes. *Nature* **601**, 252–  
608 256 (2022).
- 609 26. A. Minhas, B. Kaur, J. Kaur, “Genomics of algae: Its challenges and applications” in *Pan-*  
610 *Genomics: Applications, Challenges, and Future Prospects*, (Elsevier, 2020), pp. 261–283.
- 611 27. G. W. Tyson, *et al.*, Community structure and metabolism through reconstruction of  
612 microbial genomes from the environment. *Nature* **428**, 37–43 (2004).
- 613 28. T. O. Delmont, *et al.*, Functional repertoire convergence of distantly related eukaryotic  
614 plankton lineages abundant in the sunlit ocean. *Cell Genomics* **2**, 100123 (2022).
- 615 29. A. Peterson, J. Soberón, Species Distribution Modeling and Ecological Niche Modeling:  
616 Getting the Concepts Right (2012) <https://doi.org/10.4322/NATCON.2012.019>.
- 617 30. F. T. Dahlke, S. Wohlrab, M. Butzin, H.-O. Pörtner, Thermal bottlenecks in the life cycle  
618 define climate vulnerability of fish. *Science* **369**, 65–70 (2020).
- 619 31. G. Beaugrand, *et al.*, Prediction of unprecedented biological shifts in the global ocean.  
620 *Nat. Clim. Change* **9**, 237–243 (2019).



- 621 32. E. Faure, S.-D. Ayata, L. Bittner, Towards omics-based predictions of planktonic  
622 functional composition from environmental data. *Nat. Commun.* **12**, 4361 (2021).
- 623 33. P. Frémont, *et al.*, Restructuring of plankton genomic biogeography in the surface ocean  
624 under climate change. *Nat. Clim. Change* **12**, 393–401 (2022).
- 625 34. D. J. Richter, *et al.*, Genomic evidence for global ocean plankton biogeography shaped  
626 by large-scale current systems. 867739 (2020).
- 627 35. L. Nespoli, V. Medici, Multivariate Boosted Trees and Applications to Forecasting and  
628 Control. *J. Mach. Learn. Res.* **23**, 47 (2022).
- 629 36. M. Haimovich-Dayana, *et al.*, The role of C4 metabolism in the marine diatom  
630 *Phaeodactylum tricornutum*. *New Phytol.* **197**, 177–185 (2013).
- 631 37. P. J. McGinn, F. M. M. Morel, Expression and Inhibition of the Carboxylating and  
632 Decarboxylating Enzymes in the Photosynthetic C4 Pathway of Marine Diatoms. *Plant Physiol.*  
633 **146**, 300–309 (2008).
- 634 38. N. Grimsley, S. Yau, G. Piganeau, H. Moreau, “Typical Features of Genomes in the  
635 Mamiellophyceae” in *Marine Protists*, S. Ohtsuka, T. Suzuki, T. Horiguchi, N. Suzuki, F. Not, Eds.  
636 (Springer Japan, 2015), pp. 107–127.
- 637 39. G. Piganeau, N. Grimsley, H. Moreau, Genome diversity in the smallest marine  
638 photosynthetic eukaryotes. *Res. Microbiol.* **162**, 570–577 (2011).
- 639 40. A. S. Rigual-Hernández, *et al.*, Full annual monitoring of Subantarctic *Emiliania huxleyi*  
640 populations reveals highly calcified morphotypes in high-CO<sub>2</sub> winter conditions. *Sci. Rep.* **10**,  
641 2594 (2020).
- 642 41. R. Clement, E. Jensen, L. Prioretti, S. C. Maberly, B. Gontero, Diversity of CO<sub>2</sub>-  
643 concentrating mechanisms and responses to CO<sub>2</sub> concentration in marine and freshwater  
644 diatoms. *J. Exp. Bot.* **68**, 3925–3935 (2017).
- 645 42. M. J. Behrenfeld, K. H. Halsey, A. J. Milligan, Evolved physiological responses of  
646 phytoplankton to their integrated growth environment. *Philos. Trans. R. Soc. B Biol. Sci.* **363**,  
647 2687–2703 (2008).
- 648 43. B. A. Ward, S. Dutkiewicz, O. Jahn, M. J. Follows, A size-structured food-web model for  
649 the global ocean. *Limnol. Oceanogr.* **57**, 1877–1891 (2012).
- 650 44. X. Yin, P. C. Struik, Exploiting differences in the energy budget among C4 subtypes to  
651 improve crop productivity. *New Phytol.* **229**, 2400–2409 (2021).
- 652 45. M. J. Behrenfeld, O. Prasil, Z. S. Kolber, M. Babin, P. G. Falkowski, Compensatory  
653 changes in Photosystem II electron turnover rates protect photosynthesis from photoinhibition.  
654 *Photosynth. Res.* **58**, 259–268 (1998).
- 655 46. A. Duncan, *et al.*, Metagenome-assembled genomes of phytoplankton microbiomes  
656 from the Arctic and Atlantic Oceans. *Microbiome* **10**, 67 (2022).

- 657 47. J. Leconte, *et al.*, Genome Resolved Biogeography of Mamiellales. *Genes* **11**, 66 (2020).
- 658 48. A. Meng, *et al.*, Analysis of the genomic basis of functional diversity in dinoflagellates  
659 using a transcriptome-based sequence similarity network. *Mol. Ecol.* **27**, 2365–2380 (2018).
- 660 49. H. J. Atkinson, J. H. Morris, T. E. Ferrin, P. C. Babbitt, Using Sequence Similarity Networks  
661 for Visualization of Relationships Across Diverse Protein Superfamilies. *PLOS ONE* **4**, e4345  
662 (2009).
- 663 50. T. Aramaki, *et al.*, KofamKOALA: KEGG Ortholog assignment based on profile HMM and  
664 adaptive score threshold. *Bioinforma. Oxf. Engl.* **36**, 2251–2252 (2020).
- 665 51. Y. Escoufier, *Echantillonnage dans une population de variables aleatoires reelles*. (Dept.  
666 de math.; Univ. des sciences et techniques du Languedoc, 1970).
- 667 52. D. R. Roberts, *et al.*, Cross-validation strategies for data with temporal, spatial,  
668 hierarchical, or phylogenetic structure. *Ecography* **40**, 913–929 (2017).
- 669
